# Supplementary material for: Interconnected Ni nanowires integrated with LixMnO2 as fast charging and high volumetric capacity cathodes for Li-ion batteries
Source: Royal Society of Chemistry journal article supplement (doi:10.1039/d0ta05018k), 2020-01-01
Supplement: d0ta05018k1.pdf [file d0ta05018k1.pdf]

## ***Supporting Information***

Interconnected Ni nanowires integrated with  $\text{Li}_x\text{MnO}_2$  as fast charging and high volumetric capacity cathodes for Li-ion batteries

Stanislaw P. Zankowski<sup>a,b,\*</sup>, Diana Chaykina<sup>c</sup> and Philippe M. Vereecken<sup>a,b</sup>

<sup>a</sup> imec, Kapeldreef 75, Leuven 3001, Belgium

<sup>b</sup> M2S Department, Centre for Surface Chemistry and Catalysis, University of Leuven (KU Leuven), Kasteelpark Arenberg 23, Leuven 3001, Belgium

<sup>c</sup> Faculty of Engineering Science, University of Leuven (KU Leuven), Kasteelpark Arenberg 1, Leuven 3001, Belgium

\*E-mail: st.zankowski@gmail.com

## Supporting text

### XPS analysis of electrodeposited MnO<sub>2</sub>

The chemical state of the deposited EMD was assessed with X-ray Photoemission Spectroscopy (XPS) (Figure S2). The Mn 2p spectrum shows the 2p<sub>3/2</sub> peak centred at 642.2 eV and separated from the 2p<sub>1/2</sub> peak by 11.6 eV, which agrees with the values for MnO<sub>2</sub>.<sup>1–3</sup> Furthermore, the O 1s spectrum can be deconvoluted into three peaks at 529.7 eV, 531.1 eV and 531.7 eV, corresponding to the oxygen in the oxide (Mn-O-Mn), hydroxide (Mn-OH) and chemisorbed water, respectively.<sup>4,5</sup> Both the separation between the oxide O 1s peak and the Mn 2p<sub>3/2</sub> maximum of 112.5 eV and the background-corrected intensity ratio of these two peaks of 1.4 are also in agreement with the data for MnO<sub>2</sub>.<sup>2,3</sup> The O 1s components for -OH and H-OH are indicative to the presence of structural water,<sup>6,7</sup> whose molecular content can be estimated as 0.7 per molecule of MnO<sub>2</sub>. The structural water lowers crystallinity of nanoscale MnO<sub>2</sub>,<sup>8</sup> resulting in the absence of MnO<sub>2</sub>-specific peaks in the X-ray diffraction (XRD) spectrum (Figure 4b in the article). Lack of XRD peaks is also consistent with previous observations for EMD deposited at room temperature.<sup>9,10</sup>

### Thermodynamic calculations of solid-state MnO<sub>2</sub> lithiation

In order to examine synthetic routes of LMO within the temperature budget of the nanomesh, we compared temperature-dependent Gibbs free energies of reactions of MnO<sub>2</sub> with three common lithium precursors: LiOH, Li<sub>2</sub>CO<sub>3</sub> and LiNO<sub>3</sub>. As for the products, at least 7 different LMO's are currently known;<sup>11</sup> for our calculations we considered three of them which are commonly reported as the products of thermal lithiation of MnO<sub>2</sub>: spinel LiMn<sub>2</sub>O<sub>4</sub>, layered LiMnO<sub>2</sub> and layered Li<sub>2</sub>MnO<sub>3</sub> (other types of LMO such as spinel Li<sub>4</sub>Mn<sub>5</sub>O<sub>12</sub> were not considered due to the lack of available thermodynamic data). For example, for a spinel LiMn<sub>2</sub>O<sub>4</sub> product, the reactions could be written as:

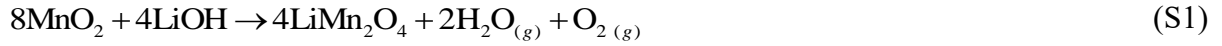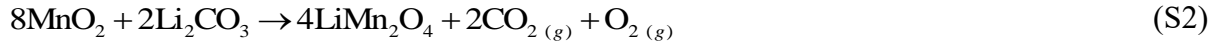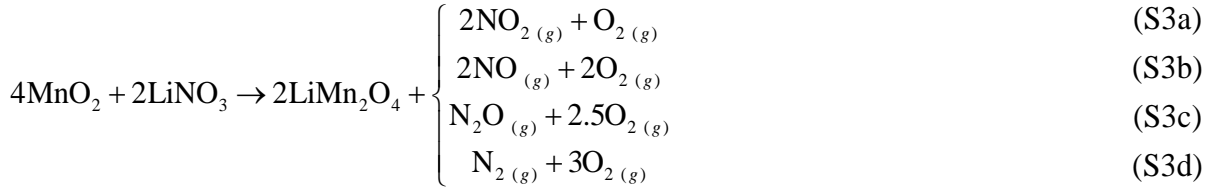

The results are presented in Figure S3. At moderately low temperatures, the thermal lithiation of  $\text{MnO}_2$  is most thermodynamically favourable using  $\text{LiOH}$  as the lithium precursor, as evident from the most negative change of Gibbs free energy ( $\Delta G$ ) for all three types of LMO products. Indeed, synthesis of  $\text{LiMnO}_2$  using solid  $\text{LiOH}$  was previously demonstrated at low temperature of 300 °C.<sup>12</sup> Although oxidation of  $\text{Ni}$  with  $\text{MnO}_2$  shows even more negative change of Gibbs free energy in the entire temperature range, for the nanomesh it is kinetically limited up to about 260 °C, as established previously. As for the reaction of  $\text{MnO}_2$  with  $\text{Li}_2\text{CO}_3$ , the equilibrium calculations predict only a slight tendency towards formation of  $\text{LiMn}_2\text{O}_4$  below 300 °C, which is in general agreement with experimental observations of Ogata *et al.*<sup>13</sup> When  $\text{LiNO}_3$  is considered as a lithium precursor, its reaction with  $\text{MnO}_2$  can proceed through different pathways, with a formation of  $\text{NO}_2$ ,  $\text{NO}$ ,  $\text{N}_2\text{O}$  or  $\text{N}_2$  (or their combination) as the by-products of decomposition of  $\text{LiNO}_3$ .<sup>14–16</sup> Unless the total decomposition of nitrate to  $\text{N}_2$  is assumed (i.e. Reaction (S3d)), the reactions of  $\text{MnO}_2$  with  $\text{LiNO}_3$  are thermodynamically unfavourable in the low-to-moderate temperature range, as expressed by the positive values of  $\Delta G$ . In practice, Kumagai *et al.* showed that reacting  $\text{MnO}_2$  with  $\text{LiNO}_3$  at the melting point of  $\text{LiNO}_3$  of 260 °C can give electrochemically active  $\text{Li}_x\text{MnO}_2$  ( $0 \leq x \leq 1$ ) after 7 days of reaction.<sup>17</sup> The activation of the nanomesh cathodes was thus tested using  $\text{LiOH}$  as the lithium precursor.

### *Method for thermodynamics calculations*

The calculations of Gibbs free energies of reactions were carried out using HSC Chemistry 9.6.1 from Outotec. The Gibbs free energies of reactions are calculated as the difference between the Gibbs free energies of formation of the products and substrates. For each species, Gibbs free energy of formation at a given temperature is calculated using equation:

$$\Delta G_f(T) = \Delta H_f(T) - \Delta S_f(T) \cdot T \quad (\text{S4})$$

where  $\Delta G_f(T)$  is the Gibbs free energy of formation at the temperature  $T$  and  $\Delta H_f(T)$  and  $\Delta S_f(T)$  are the enthalpy and entropy of formation from pure elements in their standard form, respectively.

The enthalpy of formation of a compound is calculated knowing its standard enthalpy of formation at 298.15 K and pressure of 1 bar ( $\Delta H_f^0$ ) and the integrated molar heat capacity of the compound ( $C_p$ ):

$$\Delta H(T) = \Delta H_f^0(298.15\text{K}) + \int_{298.15\text{K}}^T C_p(T) dT + \Delta H_{tr} \quad (\text{S5})$$

where  $\Delta H_{tr}$  is the enthalpy of phase transition (if applicable).

The entropy of formation of a compound is calculated as the difference between the absolute entropy of the compound and the absolute entropies of the constituent elements in their standard form. For each species, the absolute entropy at any given temperature is calculated from its standard absolute entropy at 298.15K and 1 bar ( $S^0$ ) and the heat capacity of the compound or element at that temperature:

$$S(T) = S^0(298.15\text{K}) + \int_{298.15\text{K}}^T \frac{C_p(T)}{T} dT + \frac{\Delta H_{tr}}{T_{tr}} \quad (\text{S6})$$

where  $T_{tr}$  is the temperature of phase transition (if applicable).

Therefore, to perform the calculations, the necessary input for each compound and the

constituent elements is their  $\Delta H_f^0$ ,  $S^0$ ,  $\Delta H_{tr}$  and  $T_{tr}$  (if applicable) and  $C_p$  as a function of  $T$  (note that for pure elements,  $\Delta H_f^0 = 0$ ). The  $C_p(T)$  is tabulated in a form of coefficients A-F used to calculate  $C_p$  from the polynomial:

$$C_p(T) = A + BT \times 10^{-3} + CT^{-2} \times 10^5 + DT^2 \times 10^{-6} + ET^{-3} \times 10^8 + FT^3 \times 10^{-9} \quad (S7)$$

Since the necessary thermodynamic parameters for  $\text{MnO}_2$ ,  $\text{LiOH}$ ,  $\text{Li}_2\text{CO}_3$ ,  $\text{LiNO}_3$  and the constituent elements are already included in the default HSC Chemistry database, we provide only those for lithiated manganese oxides, which we compiled from the literature (Table S1). The standard Gibbs free energies of formation of the compounds are presented in Table S2.

### Note on the phase composition of synthesized samples

The XRD diffractograms of all the annealed samples (Figure 4b in the article) show a broad peak centred at about  $18.3^\circ$ , the intensity of which increases with the temperature of thermal lithiation. Such peak can be ascribed to the monoclinic  $\text{LiMnO}_2$  ( $2\theta_{001} = 18.3^\circ$ ), but is also close to the diffraction peak of spinel forms of LMO (e.g.  $\text{LiMn}_2\text{O}_4$  or  $\text{Li}_4\text{Mn}_5\text{O}_{12}$ ,  $2\theta_{111} = 18.6 - 18.8^\circ$ ) or of the layered  $\text{Li}_2\text{MnO}_3$  ( $2\theta_{002} = 18.7^\circ$ ) (ICDD PDF cards #87-1255, #35-0782, #46-0810 and #27-1252, respectively). However, the low cyclic voltammetry activity of the samples in the 4 V region<sup>18,19</sup> suggests a little presence of electrochemically active spinel LMO's. Furthermore, the observed electrochemical activity does not come from  $\text{Li}_2\text{MnO}_3$ , since  $\text{Li}_2\text{MnO}_3$  is electrochemically inactive in the potential window of 4.4 – 2.2 V unless previously de-lithiated at a high voltage of about 4.8 V vs.  $\text{Li}^+/\text{Li}$ .<sup>20-22</sup> Also, when cycled up to 5 V, we did not observe the irreversible anodic peak characteristic to the activation of  $\text{Li}_2\text{MnO}_3$ .<sup>20,21</sup> These observations support the proposed composition of lithium-deficient  $\text{Li}_x\text{MnO}_2$ , which was also previously suggested as the product of reaction of  $\text{MnO}_2$  with  $\text{LiOH}$  at low temperatures.<sup>23,24</sup>

### ***In-situ* conversion of MnO<sub>2</sub> during ALD of LiOH/Li<sub>2</sub>O**

Besides impregnating the MnO<sub>2</sub>-coated nanomesh with drop-cast aqueous LiOH and annealing, we also attempted to facilitate the conversion of MnO<sub>2</sub> to the high-voltage spinel LMO's (e.g. LiMn<sub>2</sub>O<sub>4</sub>) *in-situ* during thermal atomic layer deposition (ALD) of LiOH/Li<sub>2</sub>O, performed at the conversion temperature of MnO<sub>2</sub> and over an extended time. This technique utilizes vapours of metalorganic precursors that can penetrate porous materials and precisely coat their internal pores (as small as ~1 nm, depending on the size of precursor molecules) with solid layers of e.g. TiO<sub>2</sub>.<sup>25,26</sup> In our case, thermal ALD was performed for 72 hours at 250 °C (the highest temperature at which the nanomesh does not oxidize), using vapours of lithium tert-butoxide and water as the ALD precursors. Such ALD process produces LiOH, which at 250 °C can simultaneously decompose into Li<sub>2</sub>O with hydroxylated surfaces.<sup>27</sup> We suspected that employing ALD could facilitate the synthesis of spinel LMO through: a) the high activity and diffusivity of Li tert-butoxide molecules in the gas phase, b) the high contact area between MnO<sub>2</sub> surfaces and ALD-deposited LiOH/Li<sub>2</sub>O, c) the extended time of processing at 250 °C. Compared to the analogous electrode obtained from drop-cast LiOH and annealing for 2 h, ALD gave an electrode with sharper voltammetry peaks in the 3 V region and more distinguishable, small peaks at about 4.1 V (Fig. S6a). Nevertheless, the absolute CV currents in the 4 V region remained low, showing that no significant amount of spinel LMO was formed. Also, during discharge-charge cycles at various C-rates, the ALD-LiOH electrode showed discharge capacities close to these of the shortly annealed sample prepared from aqueous LiOH (Fig. S6b; note that the difference between capacities at low currents falls within the sample-to-sample variability of ~10%). We can note, however, that the ALD-LiOH electrode reached relatively higher capacity at high currents with respect to its capacity at low currents. Tentatively, the differences in electrochemical performance of the two electrodes can be due to

different degree of crystallization of  $\text{Li}_x\text{MnO}_2$  prepared during 72 h of ALD annealing, as compared to the  $\text{Li}_x\text{MnO}_2$  prepared during 2 h of annealing with drop-cast LiOH.

The conversion during ALD of LiOH/ $\text{Li}_2\text{O}$  was performed inside the Picosun ALD R200 reactor integrated with an Ar-filled glovebox. The deposition was carried out at the temperature of 250 °C and the pressure of 14 mbar, using Li tert-butoxide and water vapor as the growth precursors and Ar as the carrier and purging gas. The growth was conducted for 150 ALD cycles, each consisting of a pulse of Li tert-butoxide at 150 sccm for 140 s, 500 s purge, a pulse of  $\text{H}_2\text{O}_{(\text{g})}$  at 200 sccm for 80 s and 1000 s purge. During the deposition, the Li tert-butoxide container was heated to 140 °C and to 165 °C on the valve-block while the  $\text{H}_2\text{O}$  source was maintained at 18 °C. After the deposition, the sample was immersed in  $\text{H}_2\text{O}$  for 10 min and dried in air at 120 °C for 12 h.

### **Conversion of $\text{MnO}_2$ with Li isopropoxide and Li citrate**

Besides testing the conversion of  $\text{MnO}_2$  with LiOH, we assessed Li isopropoxide and Li citrate as the alternative Li precursors. Lithium isopropoxide is a solid which at atmospheric pressure sublimates at about 230 °C, hydrolyzing to LiOH upon contact with water. Lithium citrate is a precursor used in sol-gel synthesis of LMO, which was also reported to convert EMD to spinel  $\text{LiMn}_2\text{O}_4$  at temperatures as low as 280 °C.<sup>28,29</sup> For the conversion using Li isopropoxide, the sample was placed on a hotplate in a glovebox. On the same hotplate, next to the sample, a pinch of Li isopropoxide powder (95%, Sigma Aldrich) was placed and both the sample and the powder were covered with a watch glass. The reaction was conducted for 2 hours at 250 °C, as set on the hotplate. After that time, the sample was removed from the glovebox, transported in air to a  $\text{N}_2$ -filled oven and annealed for another 2 hours at 250 °C. After that, the sample was placed in a  $\text{H}_2\text{O}$ -filled beaker for 10 min, washed under running water and dried with  $\text{N}_2$  blow.

A sol of lithium citrate was made by preparing a solution of 3 M lithium hydroxide ( $\geq 98\%$ , Sigma Aldrich), 1 M citric acid (99.5%, Sigma Aldrich) and 0.01% wt. Pluronic F-127 (Sigma Aldrich) as a single mixture in water. 20  $\mu\text{L}$  of this solution were drop cast onto the  $\text{MnO}_2$ -coated nanomesh electrode and dried with a steady stream of  $\text{N}_2$ . The sample was annealed in air at 250  $^\circ\text{C}$  using a Thermo Scientific Type F6000 Furnace. The ramp-up phase of the annealing was thoroughly optimized to avoid rapid gas evolution from the decomposing citrate. The ramp-up phase consisted of three isothermal steps: 90  $^\circ\text{C}$  for 1h, 120  $^\circ\text{C}$  for 6 h, 160  $^\circ\text{C}$  for 6 h, followed by the final anneal at 250  $^\circ\text{C}$  for 12 h. The heating rate during the ramp-up was set at 10  $^\circ\text{C}/\text{min}$ . After the annealing and cooling down, the sample was placed in a  $\text{H}_2\text{O}$ -filled beaker for 10 min, washed under running water and dried with  $\text{N}_2$  blow. The voltammetric response of both types of samples is presented in Fig. S6a.

While the isopropoxide gave electrodes with a similar voltammetric response to the ones obtained from  $\text{LiOH}$ , lithium citrate was the only precursor to yield electrodes with a distinguishable pair of spinel-like voltammetric peaks in the 4 V region. The absolute currents in the citrate-processed samples were, however, much lower than in the other samples, which could be due to some damage of the electrode structure by the excessive gas evolution during thermal decomposition of the citrate or due to the presence of insoluble residues within the electrode which were observed with SEM after the conversion and washing.

### Notes on the comparison of 3D cathodes reported in the literature

Table S3 presents data on volumetric capacities, high rate performance and volume loading of active materials in various 3D-nanostructured core-shell electrodes reported in the literature. If not explicitly reported in an article, the fractions of electrode volume occupied by active materials ( $VF_{\text{act}}$ ) were calculated according to equation:

$$VF_{\text{act}} = L_{\text{act}} / \rho_{\text{act}} \quad (\text{S8})$$

where  $L_{\text{act}}$  is the active material loading (in  $\text{g/cm}^3$ , according to electrode thickness and superficial loading of active material, typically reported in  $\text{mg/cm}^2$ ) and  $\rho_{\text{act}}$  is the crystal density of the active material:  $\rho_{\text{LiMnO}_2} = 3.89 \text{ g/cm}^3$ ,  $\rho_{\text{MnO}_2} = 4.74 \text{ g/cm}^3$  (averaged density of different polymorphs of  $\text{MnO}_2$ ),  $\rho_{\text{LiCoO}_2} = 5.05 \text{ g/cm}^3$ ,  $\rho_{\text{V}_2\text{O}_5} = 3.36 \text{ g/cm}^3$ .

The theoretical currents at 1 C are the currents required for complete removal/insertion of  $\text{Li}^+$  in the active materials in 1 hour of reactions:

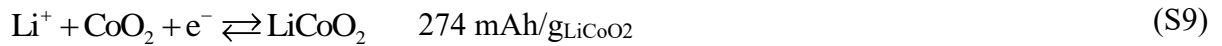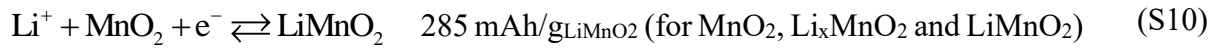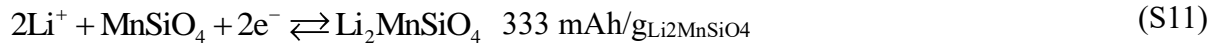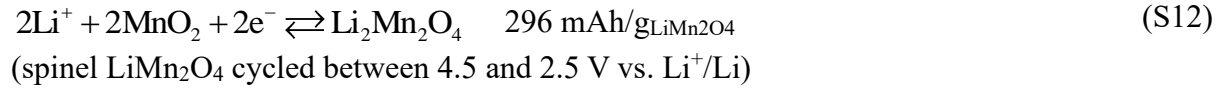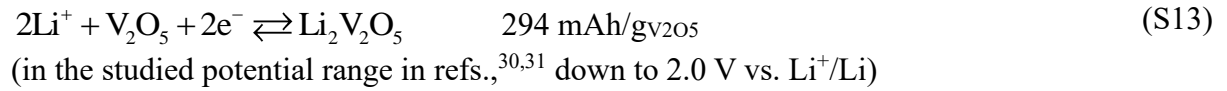

## Supporting tables

**Table S1.** Thermodynamic parameters of three LMO's used for thermodynamic calculations

| Compound                                       | $\Delta H^0$<br>(kJ/mol) | $S^0$<br>(J/(Kmol))  | A       | B       | C       | D        | E     | F       |
|------------------------------------------------|--------------------------|----------------------|---------|---------|---------|----------|-------|---------|
| m-LiMnO <sub>2</sub> <sup>*</sup>              | -828.70 <sup>32</sup>    | 78.28 <sup>‡</sup>   | -14.361 | 546.961 | -0.239  | -913.381 | 0.007 | 521.827 |
| LiMn <sub>2</sub> O <sub>4</sub> <sup>**</sup> | -1381.65 <sup>33</sup>   | 133.70 <sup>34</sup> | 154.513 | 89.929  | -38.469 | -102.414 | 4.394 | 61.706  |
| Li <sub>2</sub> MnO <sub>3</sub> <sup>†</sup>  | -1233.05 <sup>35</sup>   | 107.22 <sup>‡</sup>  | 136.850 | 22.400  | -31.220 | 0.000    | 0.000 | 0.000   |

<sup>\*</sup>For m-LiMnO<sub>2</sub>, the heat capacity coefficients (A-F) were fitted from isobaric heat capacities ( $C_p$ ) calculated from the isochoric heat capacities ( $C_v$ ) reported in ref.<sup>36</sup>, according to equation  $C_p = C_v + \beta^2 BVT$ , where  $\beta$  is the coefficient of volumetric thermal expansion (taken as  $5.64 \times 10^{-5}$  1/K),<sup>37</sup>  $B$  is the bulk modulus (102 GPa),<sup>38</sup>  $V$  is the unit cell volume ( $38.406 \text{ \AA}^3$ )<sup>38</sup> and  $T$  is temperature.

<sup>\*\*</sup>For LiMn<sub>2</sub>O<sub>4</sub>, the heat capacity coefficients were fitted from the coefficients reported in Table 3 in ref. <sup>39</sup>

<sup>†</sup>For Li<sub>2</sub>MnO<sub>3</sub>, the heat capacity coefficients were fitted from the  $C_p$  values reported in ref. <sup>35</sup>

<sup>‡</sup>Estimated with HSC Estimate Module v. 9.6.1

**Table S2.** Standard Gibbs free energies of formation

| Compound                         | $\Delta G_f^0$ (kJ/mol) |
|----------------------------------|-------------------------|
| m-LiMnO <sub>2</sub>             | -771.83                 |
| LiMn <sub>2</sub> O <sub>4</sub> | -1271.29                |
| Li <sub>2</sub> MnO <sub>3</sub> | -1146.30                |
| MnO <sub>2</sub>                 | -465.12                 |
| LiOH                             | -438.92                 |
| Li <sub>2</sub> CO <sub>3</sub>  | -1132.10                |
| LiNO <sub>3</sub>                | -384.713                |
| H <sub>2</sub> O <sub>(g)</sub>  | -228.58                 |
| CO <sub>2(g)</sub>               | -394.36                 |
| NO <sub>2(g)</sub>               | +51.18                  |
| NO <sub>(g)</sub>                | +86.61                  |
| N <sub>2</sub> O <sub>(g)</sub>  | +103.72                 |

**Table S3.** Properties of some 3D core-shell Li-ion cathodes reported in the literature

| Cathode                                            | $d_{\text{el}}$ ( $\mu\text{m}$ ) <sup>a</sup> | $t_{\text{act}}$ (nm) | Discharge capacity @<br>reported C-rate                                                  | Reported<br>current @ 1C                                                       | Theoretical<br>current @ 1C                                           | U (V) | Loading<br>( $\text{g}/\text{cm}^3$ ) | $\text{VF}_{\text{act}}$<br>(%) | $\text{VF}_s$<br>(%) | Ref. |
|----------------------------------------------------|------------------------------------------------|-----------------------|------------------------------------------------------------------------------------------|--------------------------------------------------------------------------------|-----------------------------------------------------------------------|-------|---------------------------------------|---------------------------------|----------------------|------|
| This work                                          | 3.3                                            | $12 \pm 2$            | 214 mAh/ $\text{cm}^3$ @ 1.2 C <sup>b</sup><br>94 mAh/ $\text{cm}^3$ @ 24 C <sup>b</sup> | 26.8 A/mol Mn =<br>269 mA/ $\text{cm}^3$                                       | 26.8 A/mol Mn =<br>269 mA/ $\text{cm}^3$                              | 3.0   | $\sim 0.78$<br>(LiMnO <sub>2</sub> )  | $25 \pm 10$                     | 24                   | -    |
| Li <sub>2</sub> MnSiO <sub>4</sub> /IO             | N/A                                            | 150-200               | 298 mAh/ $\text{cm}^3$ @ 0.8 C<br>191 mAh/ $\text{cm}^3$ @ 1.6 C                         | 333 mA/ $\text{g}_{\text{act}} \approx$<br>1231 mA/ $\text{cm}^3$ <sup>c</sup> | 333 mA/ $\text{g}_{\text{act}}$                                       | 3.2   | 2.8                                   | 90                              | <10                  | 40   |
| Li <sub>x</sub> MnO <sub>2</sub> /IO               | N/A                                            | 30                    | 198 mAh/ $\text{g}_{\text{act}}$ @ 1.1 C<br>76 mAh/ $\text{g}_{\text{act}}$ @ 1114 C     | 198 mAh/ $\text{g}_{\text{act}}$ <sup>c</sup>                                  | 285 mA/g LiMnO <sub>2</sub><br>$\sim 308$ mA/g MnO <sub>2</sub>       | 3.0   | N/A                                   | N/A                             | 6                    | 41   |
| MnO <sub>2</sub> /CNT                              | 60                                             | 6.5                   | 108 mAh/ $\text{cm}^3$ @ 0.1 C <sup>d</sup><br>33 mAh/ $\text{cm}^3$ @ 20 C <sup>d</sup> | 150 mA/ $\text{g}_{\text{act}} \approx$<br>52.5 mA/ $\text{cm}^3$ <sup>d</sup> | 308 mA/ $\text{g}_{\text{act}} \approx$<br>108 mA/ $\text{cm}^3$      | 3.0   | 0.35                                  | 7                               | N/A                  | 42   |
| LiMn <sub>2</sub> O <sub>4</sub> /Si $\mu\text{p}$ | $\sim 55$                                      | $\sim 250$            | 85 mAh/ $\text{cm}^3$ @ 0.1 C<br>51 mAh/ $\text{cm}^3$ @ 10 C                            | 370 $\mu\text{A}/\text{cm}^2 \approx$<br>67 mA/ $\text{cm}^3$                  | 1270 mA/ $\text{g}_{\text{act}}$<br>83 mA/ $\text{cm}^3$ <sup>e</sup> | 3.5   | 0.02 <sup>f</sup>                     | 7 <sup>f</sup>                  | $\sim 30$            | 28   |
| LiCoO <sub>2</sub> /Al NWs                         | 8                                              | 30                    | $\sim 156$ mAh/ $\text{cm}^3$ @ 0.03 C<br>$\sim 104$ mAh/ $\text{cm}^3$ @ 8 C            | $\sim 156$ mA/ $\text{cm}^3$                                                   | N/A                                                                   | 3.8   | N/A                                   | N/A                             | $\sim 40$            | 43   |
| LiCoO <sub>2</sub> /C fiber                        | 130                                            | 270-980               | 82 mAh/ $\text{cm}^3$ @ 0.1 C<br>62 mAh/ $\text{cm}^3$ @ 2 C                             | 274 mA/ $\text{g}_{\text{act}} \approx$<br>192 mA/ $\text{cm}^3$               | 274 mA/ $\text{g}_{\text{act}} \approx$<br>192 mA/ $\text{cm}^3$      | 3.9   | 0.72                                  | 14                              | 18                   | 44   |
| LiCoO <sub>2</sub> /C foam                         | 500                                            | N/A                   | 401 mAh/ $\text{cm}^3$ @ 0.05 C<br>303 mAh/ $\text{cm}^3$ @ 2 C                          | 137 mA/ $\text{g}_{\text{act}} \approx$<br>397 mA/ $\text{cm}^3$ <sup>c</sup>  | 274 mA/ $\text{g}_{\text{act}} \approx$<br>795 mA/ $\text{cm}^3$      | 3.9   | 2.9                                   | 57                              | 15                   | 45   |
| LiCoO <sub>2</sub> /CNF                            | 100                                            | $\sim 125$            | 110 mAh/ $\text{cm}^3$ @ 0.5 C<br>85 mAh/ $\text{cm}^3$ @ 50 C                           | 137 mA/ $\text{g}_{\text{act}} \approx$<br>110 mA/ $\text{cm}^3$ <sup>c</sup>  | 274 mA/ $\text{g}_{\text{act}} \approx$<br>215 mA/ $\text{cm}^3$      | 3.9   | 0.81 <sup>f</sup>                     | 16 <sup>f</sup>                 | N/A                  | 45   |
| V <sub>2</sub> O <sub>5</sub> /CNT/PAN             | 57                                             | < 100                 | 178 (139) mAh/ $\text{cm}^3$ @ 0.5 C <sup>g</sup><br>126 (96) mAh/ $\text{cm}^3$ @ 5 C   | 300 mA/ $\text{g}_{\text{act}} \approx$<br>150 mA/ $\text{cm}^3$               | 294 mA/ $\text{g}_{\text{act}} \approx$<br>152 mA/ $\text{cm}^3$      | 3.0   | 0.51 <sup>h</sup>                     | 15                              | N/A                  | 30   |

**Table S3.** Continued

| Cathode                          | $d_{el}$ ( $\mu\text{m}$ ) <sup>a</sup> | $t_{act}$ (nm) | Discharge capacity @<br>reported C-rate                                                        | Reported<br>current @ 1C                                                | Theoretical<br>current @ 1C                                             | U (V) | Loading<br>( $\text{g}/\text{cm}^3$ ) | $\text{VF}_{act}$<br>(%) | $\text{VF}_s$<br>(%) | Ref.          |
|----------------------------------|-----------------------------------------|----------------|------------------------------------------------------------------------------------------------|-------------------------------------------------------------------------|-------------------------------------------------------------------------|-------|---------------------------------------|--------------------------|----------------------|---------------|
| $\text{V}_2\text{O}_5/\text{IO}$ | 6                                       | 60             | $\sim 243 \text{ mAh}/\text{cm}^3$ @ 1 C<br>$123 \text{ mAh}/\text{cm}^3$ @ 100 C <sup>i</sup> | $294 \text{ mA}/\text{g}_{act} \approx$<br>$285 \text{ mA}/\text{cm}^3$ | $294 \text{ mA}/\text{g}_{act} \approx$<br>$285 \text{ mA}/\text{cm}^3$ | 3.0   | 0.94                                  | 28                       | $\leq 10$            | <sup>31</sup> |
| m-LiMnO <sub>2</sub> NPs         | N/A                                     | 40-60          | $170 \text{ mAh}/\text{g}$ @ 50 mA/g<br>$\sim 66 \text{ mAh}/\text{g}$ @ 1000 mA/g             | N/A                                                                     | $285 \text{ mA}/\text{g}_{act}$                                         | 3.3   | $2 \text{ mg}/\text{cm}^2$            | N/A                      | N/A                  | <sup>46</sup> |

<sup>a</sup> Abbreviations:  $d_{el}$  – thickness of 3D electrode,  $t_{act}$  – thickness of active material layer, U – average discharge potential at low C-rates,  $\text{VF}_{act}$  – volume fraction of 3D electrode occupied by active material,  $\text{VF}_s$  – volume fraction of 3D electrode occupied by 3D substrate, IO – inverse opals,  $\mu\text{p}$  – micropillars, NWs – nanowires, CNT – carbon nanotubes, PAN – polyacrylonitrile nanofibers, CNF – carbon nanofibers, NPs – nanoparticles

<sup>b</sup> averaged from five discharge-charge cycles at 24 C

<sup>c</sup> based on the correspondence with the first author

<sup>d</sup> based on the reported gravimetric capacities, electrode thickness and averaged loading of MnO<sub>2</sub> of  $2.1 \text{ mg}/\text{cm}^2$

<sup>e</sup> based on the claim that the capacity recorded at 10 C corresponds to 61% of theoretical capacity

<sup>f</sup> inferred from the discharge capacity at the lowest C-rate

<sup>g</sup> The authors report gravimetric capacity of  $149 \text{ mAh}/\text{g}_{cathode}$  corresponding to volumetric capacity of  $178 \text{ mAh}/\text{cm}^3$ . However, calculating volumetric capacity using the reported electrode thickness ( $57 \mu\text{m}$ ), superficial cathode density ( $5.2 \text{ mg}/\text{cm}^2$ ) and gravimetric capacity gives volumetric capacity of  $139 \text{ mAh}/\text{cm}^3$ . We have asked the authors for clarification of this discrepancy but received no response up to date. Thus, next to the original volumetric capacities, we give in parenthesis the values calculated according to the reported electrode dimensions, density and gravimetric capacity.

<sup>h</sup> based on the reported  $\text{V}_2\text{O}_5$  mass fraction of 56%, electrode thickness and superficial cathode density.

<sup>i</sup> based on the reported relationship between gravimetric and volumetric capacities

## Supporting figures

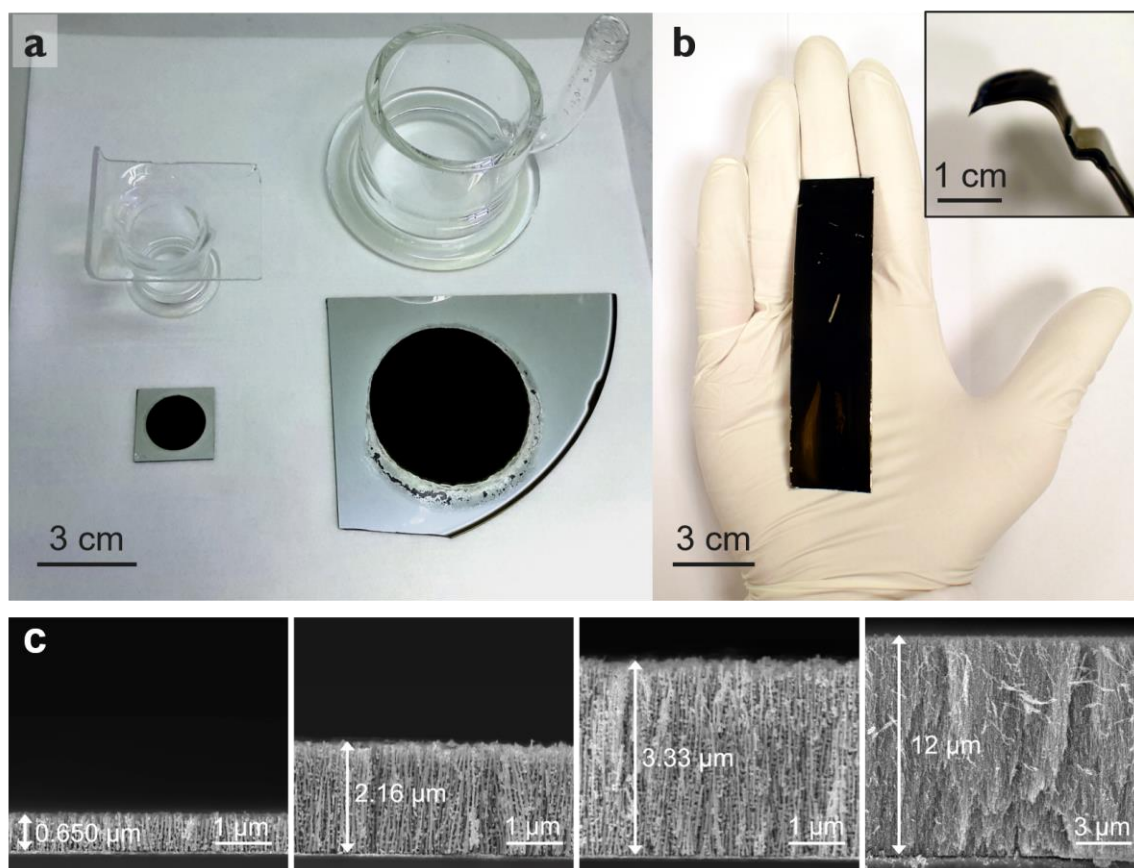

**Fig. S1** Up-scalable character of the Ni nanomeshes in area, shape and thickness. (a) Photograph of two circular wafer-supported nanomeshes with 2.5 cm<sup>2</sup> and 25 cm<sup>2</sup> footprint area (black area in the middle of each wafer), prepared using electrochemical cells with different window size (shown above the wafers); (b) Photograph of a free-standing rectangular nanomesh foil, also showing the flexibility of the free-standing nanomesh foil (inset); (c) SEM images of nanomeshes with increasing network thicknesses. The thickness of the nanomesh can be precisely adjusted by changing the time of Ni electrodeposition.

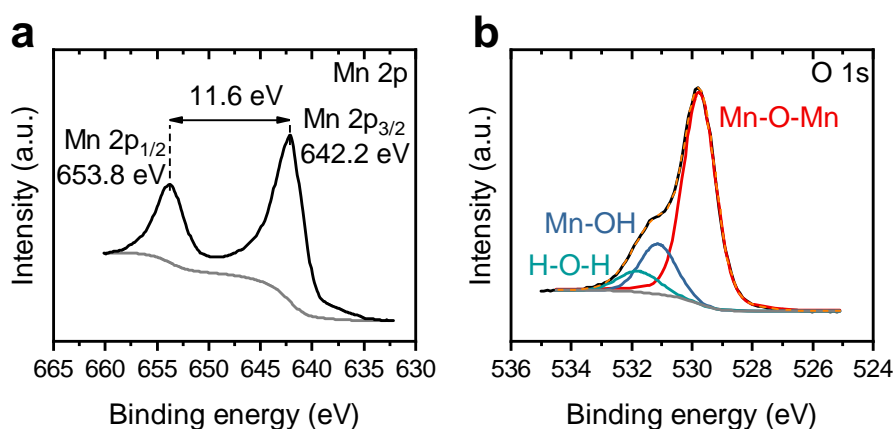

**Fig. S2** XPS spectra of MnO<sub>2</sub>. (a) Mn 2p spectrum; (b) O 1s spectrum. The content of structural water (-OH and H-OH) in the material was calculated as  $2n(1-n)^{-1}$ , where  $n$  is the sum of relative contributions of the -OH and H-OH peak areas to the overall O 1s spectrum.

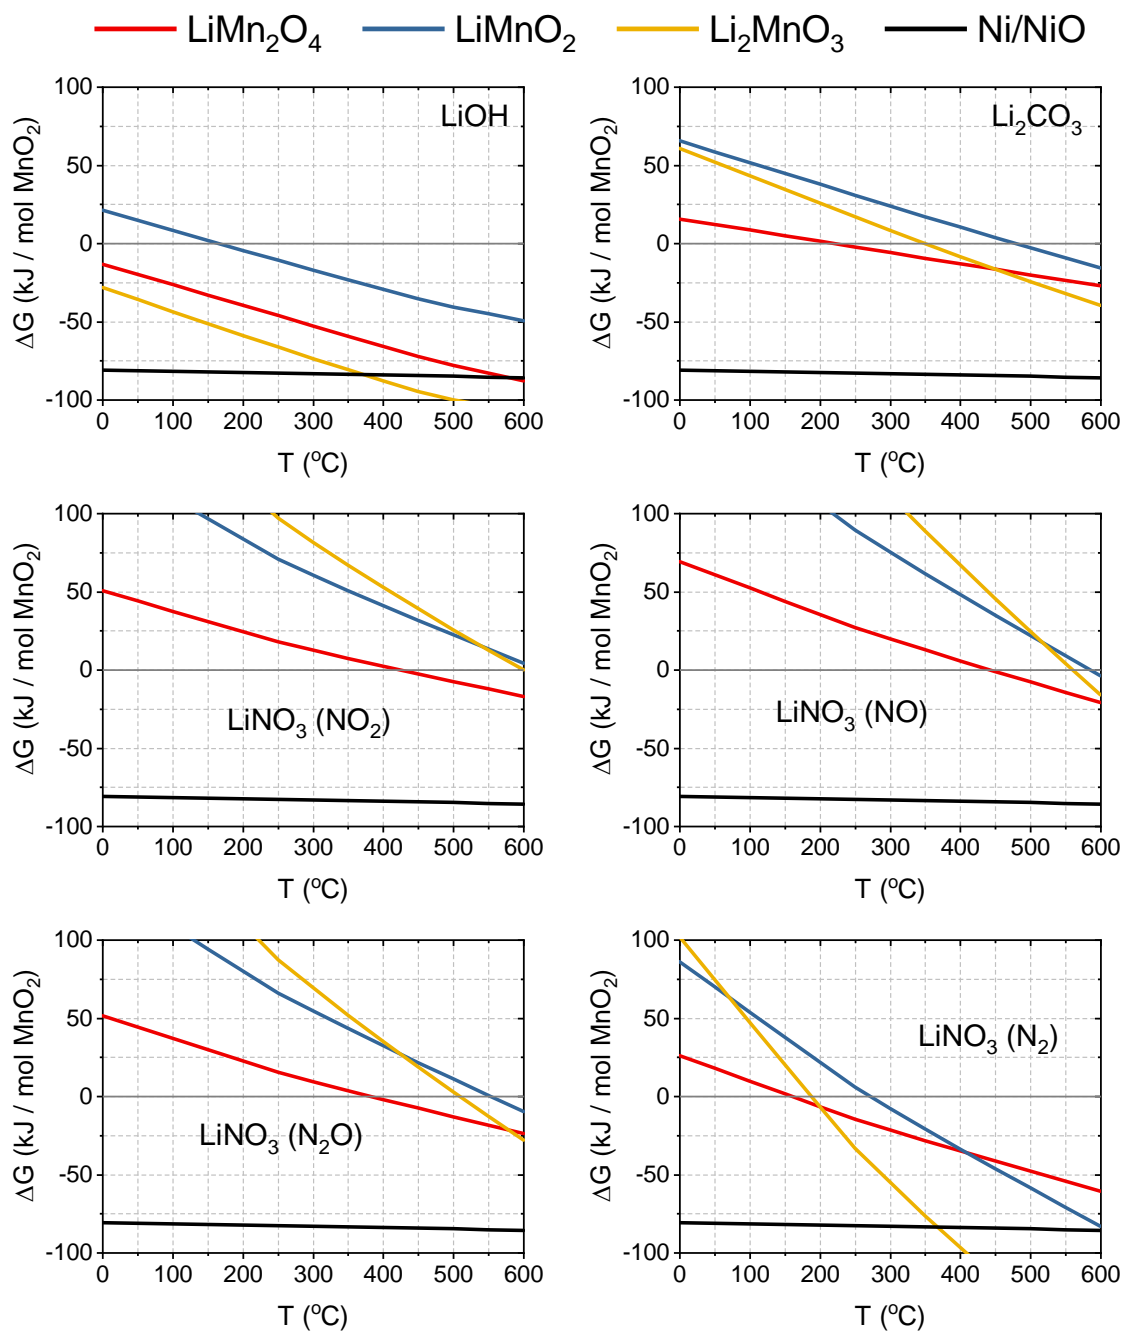

**Fig. S3** Calculated Gibbs free energies of formation of  $\text{LiMn}_2\text{O}_4$ ,  $\text{LiMnO}_2$  and  $\text{Li}_2\text{MnO}_3$  through reaction of  $\text{MnO}_2$  with  $\text{LiOH}$ ,  $\text{Li}_2\text{CO}_3$  and  $\text{LiNO}_3$ . For  $\text{LiNO}_3$ , the reactions were considered for different gaseous reduction products ( $\text{NO}_2$ ,  $\text{NO}$ ,  $\text{N}_2\text{O}$  and  $\text{N}_2$ ). The Gibbs free energy of oxidation of  $\text{Ni}$  with  $\text{MnO}_2$  is also given ( $\text{Ni/NiO}$ ).

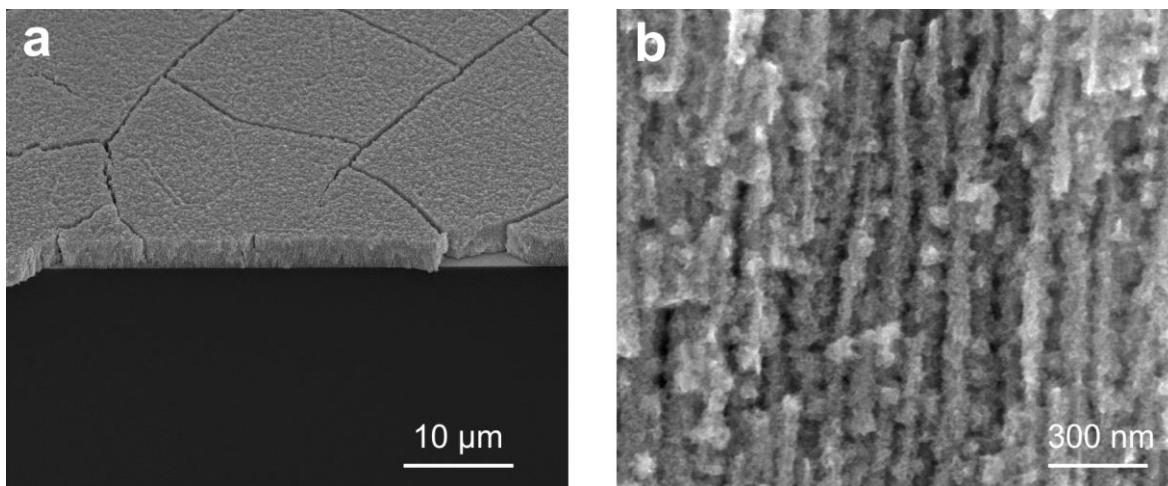

**Fig. S4** SEM images of the  $\text{Li}_x\text{MnO}_2$ -coated nanomesh electrode made by impregnation with LiOH, annealing at 250 °C and washing with water. (a) Low magnification image taken at 45° angle, (b) High magnification cross section image.

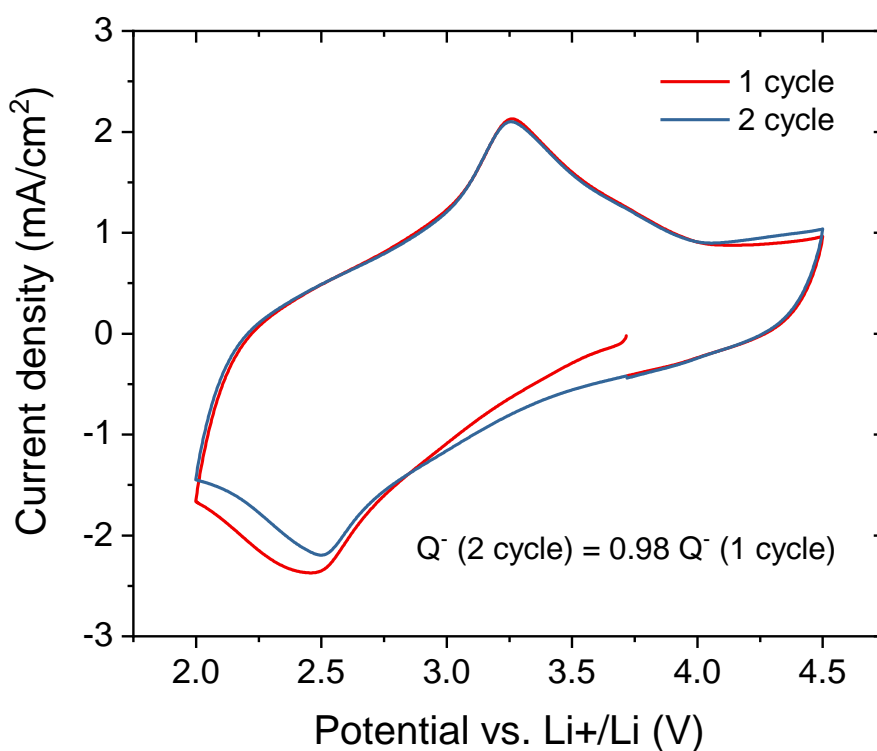

**Fig. S5.** Cyclic voltammograms of nanomesh cathode prepared from drop-cast LiOH annealed at 250 °C, showing first and second CV scan. The large cathodic peak in the initial negative scan indicates lithium insertion into the as-synthesized, mostly lithium-free  $\text{Li}_x\text{MnO}_2$  (the integrated cathodic charge recorded in the second CV cycle was 0.98 of the cathodic charge in the first cycle). The voltammograms were recorded in 1 M  $\text{LiClO}_4$  / propylene carbonate at 10 mV/s.

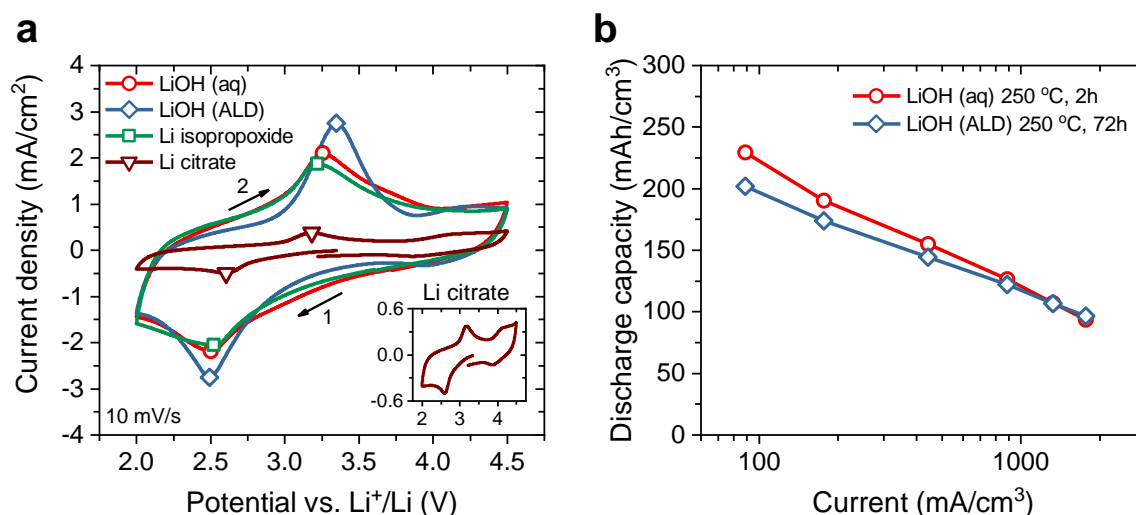

**Fig. S6.** Electrochemistry of  $\text{Li}_x\text{MnO}_2$ /nanomesh electrodes prepared from different precursors and methods. (a) Cyclic voltammetry, (b) Mean discharge capacity recorded at various currents between 4 and 2 V vs.  $\text{Li}^+/\text{Li}$  on electrodes prepared from drop-cast and ALD-deposited LiOH. For each current, five discharge-charge cycles were recorded, and the capacities averaged. The electrochemical measurements were performed in 1 M solution of  $\text{LiClO}_4$  in propylene carbonate. The electrode prepared from drop-cast LiOH was annealed in  $\text{N}_2$  at 250 °C for 2 h and the electrode prepared through ALD deposition of LiOH was processed in Ar at 250 °C for 72 h. The electrode prepared from Li isopropoxide was annealed in Ar for 2 h at 250°C, followed by annealing in  $\text{N}_2$  for 2 h. The electrode prepared from drop-cast Li citrate was annealed in air at 250 °C for 12 h.

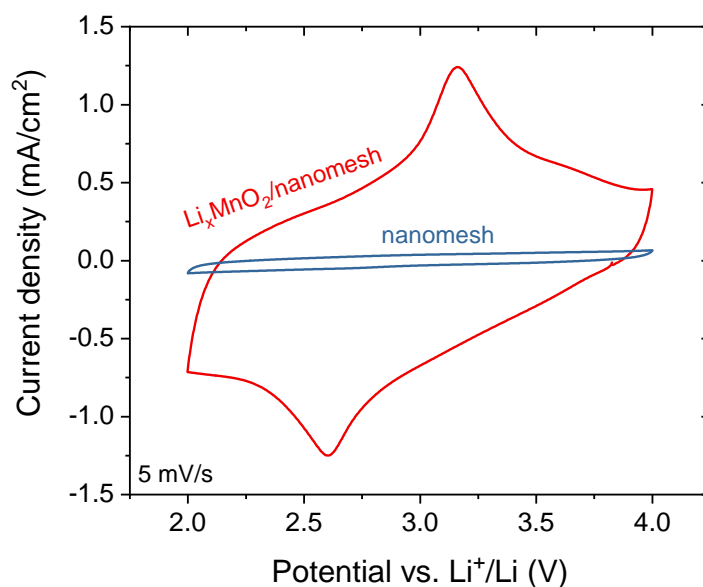

**Fig. S7.** Cyclic voltammograms of the  $\text{Li}_x\text{MnO}_2$ -coated nanomesh and of a nanomesh with thermally oxidized surface. The ratio between the charges recorded on the bare and  $\text{Li}_x\text{MnO}_2$ -coated nanomesh of 0.06 was used for subtracting capacity due to background processes from the recorded capacities on the nanomesh cathodes.

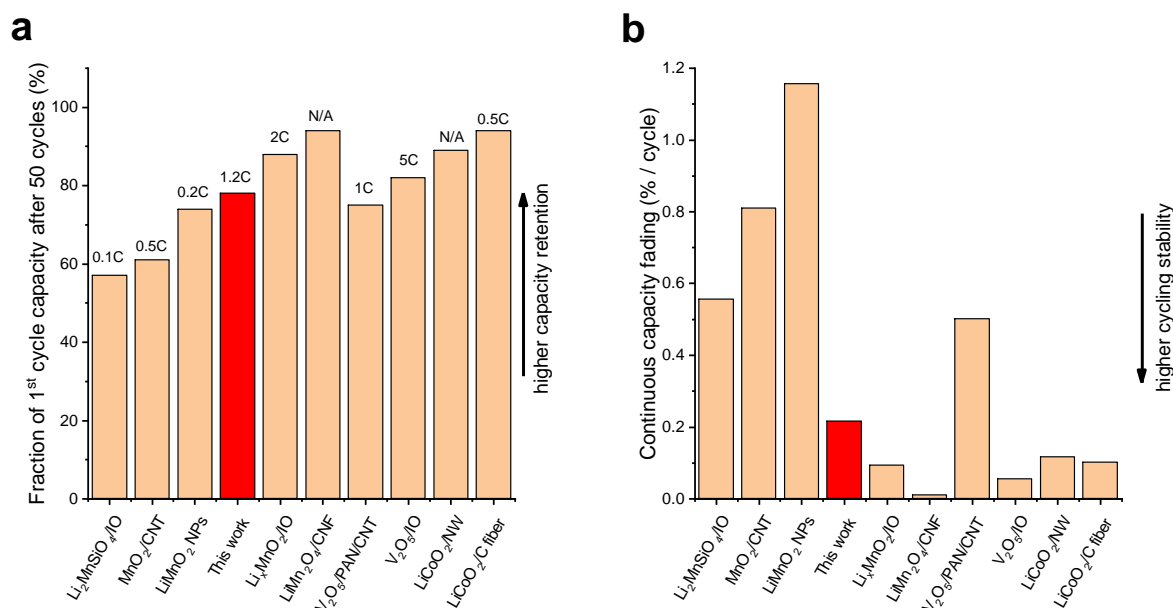

**Fig. S8.** Stability of Li<sub>x</sub>MnO<sub>2</sub>/nanomesh and other 3D-nanostructured core-shell electrodes reported in the literature. (a) Capacity retention after 50 cycles with respect to the first cycle capacity; (b) Capacity fading during continuous cycling. The nominal C-rates (C-rates based on estimated maximum theoretical capacities) at which the measurements were performed are presented in (a). The capacity fade in (b) was calculated from the relation  $a/C_{40}$ , where  $a$  is the linear slope of the capacity change between 40<sup>th</sup> and 50<sup>th</sup> cycle and  $C_{40}$  is the capacity at 40<sup>th</sup> cycle. The literature data was graphically extracted using WebPlotDigitizer. The references are presented in Table S3.

## Bibliography

- (1) Di Castro, V.; Polzonetti, G. XPS Study of MnO Oxidation. *J. Electron Spectros. Relat. Phenomena* **1989**, *48*, 117–123.
- (2) Foord, J. S.; Jackman, R. B.; Allen, G. C. An X-Ray Photoelectron Spectroscopic Investigation of the Oxidation of Manganese. *Philos. Mag. A Phys. Condens. Matter, Struct. Defects Mech. Prop.* **1984**, *49* (5), 657–663. <https://doi.org/10.1080/01418618408233293>.
- (3) Chigane, M.; Ishikawa, M. Manganese Oxide Thin Film Preparation by Potentiostatic Electrolyses and Electrochromism. *J. Electrochem. Soc.* **2000**, *147* (6), 2246. <https://doi.org/10.1149/1.1393515>.
- (4) Nesbitt, H. W.; Banerjee, D. Interpretation of XPS Mn(2p) Spectra of Mn Oxyhydroxides and Constraints on the Mechanism of MnO<sub>2</sub> Precipitation. *Am. Mineral.* **1998**, *83* (3–4), 305–315. <https://doi.org/10.2138/am-1998-3-414>.
- (5) Biesinger, M. C.; Payne, B. P.; Grosvenor, A. P.; Lau, L. W. M.; Gerson, A. R.; Smart, R. S. C. Resolving Surface Chemical States in XPS Analysis of First Row Transition Metals, Oxides and Hydroxides: Cr, Mn, Fe, Co and Ni. *Appl. Surf. Sci.* **2011**, *257* (7), 2717–2730. <https://doi.org/10.1016/j.apsusc.2010.10.051>.
- (6) Dose, W. M.; Donne, S. W. Thermal Treatment Effects on Manganese Dioxide Structure, Morphology and Electrochemical Performance. *J. Electrochem. Soc.* **2011**, *158* (8), A905. <https://doi.org/10.1149/1.3597640>.
- (7) Lee, J. A.; Newnham, C. E.; Tye, F. L. Energetics of Water Desorption from a  $\gamma$ -Manganese Dioxide. *J. Colloid Interface Sci.* **1973**, *42* (2), 372–380. [https://doi.org/10.1016/0021-9797\(73\)90302-0](https://doi.org/10.1016/0021-9797(73)90302-0).
- (8) Birkner, N.; Navrotsky, A. Thermodynamics of Manganese Oxides: Effects of Particle Size and Hydration on Oxidation-Reduction Equilibria among Hausmannite, Bixbyite, and Pyrolusite. *Am. Mineral.* **2012**, *97* (8–9), 1291–1298. <https://doi.org/10.2138/am.2012.3982>.
- (9) Etman, A. S.; Radisic, A.; Mahmoud, E.; Huyghebaert, C.; Vereecken, P. M.; Emara, M. M.;

- Huyghebaert, C.; Vereecken, P. M. Effect of Film Morphology on the Li-Ion Intercalation Kinetics in Anodic Porous Manganese Dioxide Thin-Films. *J. Phys. Chem. C* **2014**, *118* (19), 9889–9898. <https://doi.org/10.1021/jp4105008>.
- (10) Chen, L.; van Zomeren, A.; Schooman, J. Amorphous MnO<sub>2</sub> Thin Film Cathode for Rechargeable Lithium Batteries. *Solid State Ionics* **1994**, *67* (3–4), 203–208. [https://doi.org/10.1016/0167-2738\(94\)90006-X](https://doi.org/10.1016/0167-2738(94)90006-X).
  - (11) Thackeray, M. M.; Croy, J. R.; Lee, E.; Gutierrez, A.; He, M.; Park, J. S.; Yonemoto, B. T.; Long, B. R.; Blauwkamp, J. D.; Johnson, C. S.; et al. The Quest for Manganese-Rich Electrodes for Lithium Batteries: Strategic Design and Electrochemical Behavior. *Sustain. Energy Fuels* **2018**, *2* (7), 1375–1397. <https://doi.org/10.1039/c8se00157j>.
  - (12) Reimers, J. N.; Fuller, E. W.; Dahn, J. R. Synthesis and Electrochemical Studies of LiMnO<sub>2</sub> Prepared at Low Temperatures. *J. Electrochem. Soc.* **1993**, *140* (12), 3396–3401. <https://doi.org/10.1149/1.2221101>.
  - (13) Ogata, A.; Shimizu, T.; Komaba, S. Crystallization of LiMn<sub>2</sub>O<sub>4</sub> Observed with High Temperature X-Ray Diffraction. *J. Power Sources* **2007**, *174* (2), 756–760. <https://doi.org/10.1016/j.jpowsour.2007.06.150>.
  - (14) McManis, G. E.; Miles, M. H.; Fletcher, A. N. Performance and Discharge Characteristics of Ca/LiCl, LiNO<sub>3</sub>/LiNO<sub>3</sub>, AgNO<sub>3</sub>/Ni Thermal Battery Cells. *J. Electrochem. Soc.* **1984**, *131* (2), 283–286.
  - (15) Lee, A. K. K.; Johnson, E. F. The Stoichiometry and Kinetics of the Thermal Decomposition of Molten Anhydrous Lithium Nitrite. *Inorg. Chem.* **1972**, *11* (4), 782–787. <https://doi.org/10.1021/ic50110a025>.
  - (16) Stern, K. H. High Temperature Properties and Decomposition of Inorganic Salts Part 3, Nitrates and Nitrites. *J. Phys. Chem. Ref. Data* **1972**, *1* (3), 747–772. <https://doi.org/10.1063/1.3253104>.
  - (17) Kumagai, N.; Saito, T.; Komaba, S. Synthesis of Ternary Li-Mn-O Phase at a Temperature of 260 °C and Electrochemical Lithium Insertion into the Oxide. *J. Appl. Electrochem.* **2000**, *30* (2), 159–163. <https://doi.org/10.1023/A:1003819905672>.
  - (18) Put, B.; Vereecken, P. M.; Labyedh, N.; Sepulveda, A.; Huyghebaert, C.; Radu, I. P.; Stesmans, A. High Cycling Stability and Extreme Rate Performance in Nanoscaled LiMn<sub>2</sub>O<sub>4</sub> Thin Films. *ACS Appl. Mater. Interfaces* **2015**, *7* (40), 22413–22420. <https://doi.org/10.1021/acsami.5b06386>.
  - (19) Xie, Z.; Eikhuemelo, H.; Zhao, J.; Cain, C.; Xu, W.; Wang, Y. Ni and Fe Dual-Doped Li<sub>4</sub>Mn<sub>5</sub>O<sub>12</sub> Spinel as Cathode Materials for High-Voltage Li-Ion Batteries. *J. Electrochem. Soc.* **2015**, *162* (8), A1523–A1529. <https://doi.org/10.1149/2.0601508jes>.
  - (20) Saroha, R.; Gupta, A.; Panwar, A. K. Electrochemical Performances of Li-Rich Layered-Layered Li<sub>2</sub>MnO<sub>3</sub>-LiMnO<sub>2</sub> solid Solutions as Cathode Material for Lithium-Ion Batteries. *J. Alloys Compd.* **2017**, *696*, 580–589. <https://doi.org/10.1016/j.jallcom.2016.11.199>.
  - (21) Hy, S.; Felix, F.; Rick, J.; Su, W. N.; Hwang, B. J. Direct in Situ Observation of Li<sub>2</sub>O Evolution on Li-Rich High-Capacity Cathode Material, Li[Ni<sub>x</sub>Li<sub>(1-2x)/3</sub>Mn<sub>(2-x)/3</sub>]O<sub>2</sub> (0 ≤ x ≤ 0.5). *J. Am. Chem. Soc.* **2014**, *136* (3), 999–1007. <https://doi.org/10.1021/ja410137s>.
  - (22) Amalraj, S. F.; Sharon, D.; Talianker, M.; Julien, C. M.; Burlaka, L.; Lavi, R.; Zhecheva, E.; Markovsky, B.; Zinigrad, E.; Kovacheva, D.; et al. Study of the Nanosized Li<sub>2</sub>MnO<sub>3</sub>: Electrochemical Behavior, Structure, Magnetic Properties, and Vibrational Modes. *Electrochim. Acta* **2013**, *97*, 259–270. <https://doi.org/10.1016/j.electacta.2013.03.029>.
  - (23) Thackeray, M. M. Manganese Oxides for Lithium Batteries. *Prog. Solid State Chem.* **1997**, *25* (1), 1–71. [https://doi.org/10.1016/S0079-6786\(97\)81003-5](https://doi.org/10.1016/S0079-6786(97)81003-5).
  - (24) Thackeray, M. M.; Rossouw, M. H.; de Kock, A.; de la Harpe, A. P.; Gummow, R. J.; Pearce, K.; Liles, D. C. The Versatility of MnO<sub>2</sub> for Lithium Battery Applications. *J. Power Sources* **1993**, *43* (1–3), 289–300. [https://doi.org/10.1016/0378-7753\(93\)80126-A](https://doi.org/10.1016/0378-7753(93)80126-A).
  - (25) Dendooven, J.; Pulinthanathu Sree, S.; De Keyser, K.; Deduytsche, D.; Martens, J. A.; Ludwig, K. F.; Detavernier, C. In Situ X-Ray Fluorescence Measurements during Atomic Layer Deposition: Nucleation and Growth of TiO<sub>2</sub> on Planar Substrates and in Nanoporous Films. *J. Phys. Chem. C* **2011**, *115* (14), 6605–6610. <https://doi.org/10.1021/jp111314b>.
  - (26) Detavernier, C.; Dendooven, J.; Pulinthanathu Sree, S.; Ludwig, K. F.; Martens, J. A. Tailoring Nanoporous Materials by Atomic Layer Deposition. *Chemical Society Reviews*. The Royal Society of Chemistry October 17, 2011, pp 5242–5253. <https://doi.org/10.1039/c1cs15091j>.
  - (27) Kozen, A. C.; Pearce, A. J.; Lin, C. F.; Schroeder, M. A.; Noked, M.; Lee, S. B.; Rubloff, G. W. Atomic Layer Deposition and in Situ Characterization of Ultraclean Lithium Oxide and Lithium Hydroxide. *J. Phys. Chem. C* **2014**, *118* (48), 27749–27753. <https://doi.org/10.1021/jp509298r>.
  - (28) Labyedh, N.; Mattelaer, F.; Detavernier, C.; Vereecken, P. M. 3D LiMn<sub>2</sub>O<sub>4</sub> Thin-Film Electrodes for High Rate All Solid-State Lithium and Li-Ion Microbatteries. *J. Mater. Chem. A* **2019**, *7* (32), 18996–19007. <https://doi.org/10.1039/c9ta03703a>.
  - (29) Maino, G.; Carleer, R.; Marchal, W.; Bonneux, G.; Hardy, A.; Van Bael, M. K. Remarkable Lowering in the Synthesis Temperature of LiMn<sub>2</sub>O<sub>4</sub>: Via Citrate Solution-Gel Synthesis Facilitated by Ethanol. *Dalt. Trans.* **2017**, *46* (43), 14934–14946. <https://doi.org/10.1039/c7dt03100a>.

- (30) Lee, J. H.; Kim, J. M.; Kim, J. H.; Jang, Y. R.; Kim, J. A.; Yeon, S. H.; Lee, S. Y. Toward Ultrahigh-Capacity V<sub>2</sub>O<sub>5</sub> Lithium-Ion Battery Cathodes via One-Pot Synthetic Route from Precursors to Electrode Sheets. *Adv. Mater. Interfaces* **2016**, *3* (14), 1–10. <https://doi.org/10.1002/admi.201600173>.
- (31) Liu, J.; Zheng, Q.; Goodman, M. D.; Zhu, H.; Kim, J.; Krueger, N. A.; Ning, H.; Huang, X.; Liu, J.; Terrones, M.; et al. Graphene Sandwiched Mesosstructured Li-Ion Battery Electrodes. *Adv. Mater.* **2016**, *28* (35), 7696–7702. <https://doi.org/10.1002/adma.201600829>.
- (32) Wang, M.; Navrotsky, A. LiMO<sub>2</sub> (M=Mn, Fe, and Co): Energetics, Polymorphism and Phase Transformation. *J. Solid State Chem.* **2005**, *178* (4), 1230–1240. <https://doi.org/10.1016/j.jssc.2005.01.028>.
- (33) Cupid, D. M.; Reif, A.; Seifert, H. J. Enthalpy of Formation of Li<sub>1+x</sub>Mn<sub>2</sub>-XO<sub>4</sub> (0 < x < 0.1) Spinel Phases. *Thermochim. Acta* **2015**, *599*, 35–41. <https://doi.org/10.1016/j.tca.2014.11.003>.
- (34) Knyazev, A. V.; Mączka, M.; Smirnova, N. N.; Knyazeva, S. S.; Chernorukov, N. G.; Ptak, M.; Shushunov, A. N. Study of the Phase Transition and Thermodynamic Functions of LiMn<sub>2</sub>O<sub>4</sub>. *Thermochim. Acta* **2014**, *593*, 58–64. <https://doi.org/http://dx.doi.org/10.1016/j.tca.2014.08.020>.
- (35) Cupid, D. M.; Li, D.; Gebert, C.; Reif, A.; Flandorfer, H.; Seifert, H. J. Enthalpy of Formation and Heat Capacity of Li<sub>2</sub>MnO<sub>3</sub>. *J. Ceram. Soc. Japan* **2016**, *124* (10), 1072–1082. <https://doi.org/10.2109/jcersj2.16116>.
- (36) Du, T.; Xu, B.; Wu, M.; Liu, G.; Ouyang, C. Insight into the Vibrational and Thermodynamic Properties of Layered Lithium Transition-Metal Oxides LiMO<sub>2</sub> (M = Co, Ni, Mn): A First-Principles Study. *J. Phys. Chem. C* **2016**, *120* (11), 5876–5882. <https://doi.org/10.1021/acs.jpcc.5b11891>.
- (37) Yabuuchi, N.; Kim, Y.-T.; Li, H. H.; Shao-Horn, Y. Thermal Instability of Cycled Li<sub>x</sub>Ni<sub>0.5</sub>Mn<sub>0.5</sub>O<sub>2</sub> Electrodes: An in Situ Synchrotron X-Ray Powder Diffraction Study. *Chem. Mater.* **2008**, *20*, 4936–4951.
- (38) Kristin, P. Materials Data on LiMnO<sub>2</sub> (SG:12) by Materials Project. 2014. <https://doi.org/10.17188/1302955>.
- (39) Gotcu, P.; Seifert, H. J. Thermophysical Properties of LiCoO<sub>2</sub>-LiMn<sub>2</sub>O<sub>4</sub> Blended Electrode Materials for Li-Ion Batteries. *Phys. Chem. Chem. Phys.* **2016**, *18* (15), 10550–10562. <https://doi.org/10.1039/c6cp00887a>.
- (40) Liu, J.; Lin, X.; Zhang, H.; Shen, Z.; Lu, Q.; Niu, J.; Li, J.; Braun, P. V. A Bee Pupa-Infilled Honeycomb Structure-Inspired Li<sub>2</sub>MnSiO<sub>4</sub> Cathode for High Volumetric Energy Density Secondary Batteries. *Chem. Commun.* **2019**, *55* (25). <https://doi.org/10.1039/c9cc00729f>.
- (41) Zhang, H.; Yu, X.; Braun, P. V. Three-Dimensional Bicontinuous Ultrafast-Charge and-Discharge Bulk Battery Electrodes. *Nat. Nanotechnol.* **2011**, *6* (5), 277–281. <https://doi.org/10.1038/nnano.2011.38>.
- (42) Lou, F.; Zhou, H.; Huang, F.; Vullum-Bruer, F.; Tran, T. D.; Chen, D. Facile Synthesis of Manganese Oxide/Aligned Carbon Nanotubes over Aluminium Foil as 3D Binder Free Cathodes for Lithium Ion Batteries. *J. Mater. Chem. A* **2013**, *1* (11), 3757–3767. <https://doi.org/10.1039/c3ta00793f>.
- (43) Shaijumon, M. M.; Perre, E.; Daffos, B.; Taberna, P.-L.; Tarascon, J.-M.; Simon, P. Nanoarchitected 3D Cathodes for Li-Ion Microbatteries. *Adv. Mater.* **2010**, *22* (44), 4978–4981. <https://doi.org/10.1002/adma.201001922>.
- (44) Self, E. C.; McRen, E. C.; Wycisk, R.; Pintauro, P. N. LiCoO<sub>2</sub>-Based Fiber Cathodes for Electrospun Full Cell Li-Ion Batteries. *Electrochim. Acta* **2016**, *214*, 139–146. <https://doi.org/10.1016/j.electacta.2016.08.033>.
- (45) Zhang, H.; Ning, H.; Busbee, J.; Shen, Z.; Kiggins, C.; Hua, Y.; Eaves, J.; Davis, J.; Shi, T.; Shao, Y. T.; et al. Electroplating Lithium Transition Metal Oxides. *Sci. Adv.* **2017**, *3* (5), 1–9. <https://doi.org/10.1126/sciadv.1602427>.
- (46) Zhou, H.; Li, Y.; Zhang, J.; Kang, W.; Yu, D. Y. W. Low-Temperature Direct Synthesis of Layered m-LiMnO<sub>2</sub> for Lithium-Ion Battery Applications. *J. Alloys Compd.* **2016**, *659*, 248–254. <https://doi.org/10.1016/j.jallcom.2015.11.038>.
